# Supplementary material for: New Strategies to Increase the Abiotic Stress Tolerance in Woody Ornamental Plants in Mediterranean Climate
Source: MDPI journal article supplement (doi:10.3390/plants12102022), 2023-05-18
Supplement: s1 [file s1]

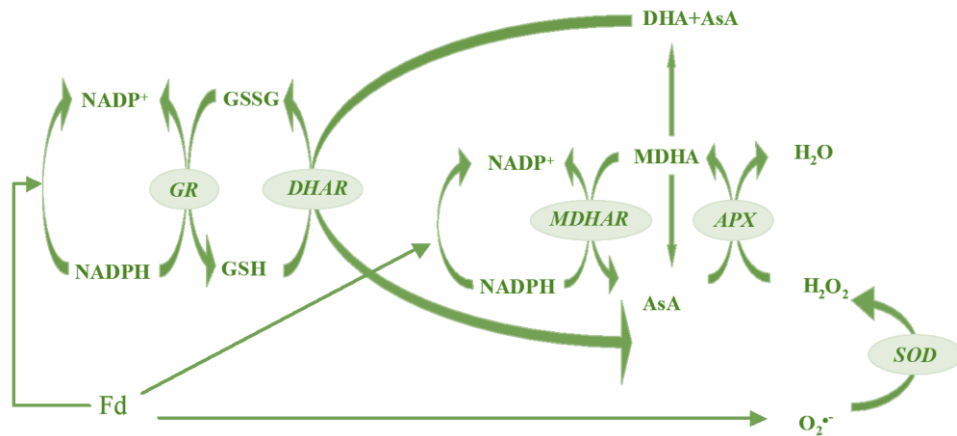

**Figure S1.** The detoxification enzymes belonging to ascorbate-glutathione cycle. The superoxide radicals ( $O_2^{\cdot-}$ ) are removed by superoxide dismutase (SOD) which leads to hydrogen peroxide ( $H_2O_2$ ) formation. The ascorbate ( $AsA$ ) is regenerated by oxidized forms by a cycle catalyzed by ascorbate peroxidase (APX) enzyme. The  $AsA$  is converted in monodehydroascorbate (MDHA) by APX, then the monodehydroascorbate reductase (MDHAR) oxidizes the MDHA and reduces the  $NADP^+$  that is regenerated by Ferredoxin (Fd). The MDHA can be converted to  $AsA$  and dehydroascorbate (DHA) by non-enzymatic reaction. The DHA is converted by dehydroascorbate reductase enzyme (DHAR) in  $AsA$ , contemporary the reduced glutathione (GSH) is transformed in oxidized glutathione (GSSG) by  $NADPH$ .
